# Supplementary material for: Characterization of sequence-specific errors in various next-generation sequencing systems
Source: Royal Society of Chemistry journal article supplement (doi:10.1039/c5mb00750j), 2016-01-21
Supplement: c5mb00750j1.pdf [file c5mb00750j1.pdf]

Supplementary Table S1 | Mock community construction.

| <b>Strain</b>                                | <b>Size (bp)</b> | <b>GC content (%)</b> |
|----------------------------------------------|------------------|-----------------------|
| <i>Roseobacter denitrificans</i> OCh114      | 4,330,000        | 58.9                  |
| <i>Staphylococcus epidermidis</i> ATCC 12228 | 2,560,000        | 32.1                  |
| <i>Polaromonas naphthalenivorans</i> CJ2     | 5,370,000        | 61.7                  |
| <i>Chromobacterium violaceum</i> ATCC 12472  | 4,750,000        | 64.8                  |
| <i>Corynebacterium glutamicum</i> ATCC 13032 | 3,310,000        | 53.8                  |
| <i>Klebsiella pneumoniae</i> KCTC 2242       | 5,460,000        | 57.3                  |
| <i>Pseudomonas stutzeri</i> ATCC 17588       | 4,550,000        | 63.9                  |
| <i>Arthrobacter chlorophenolicus</i> A6      | 4,980,000        | 66.0                  |
| <i>Escherichia coli</i> Strain W             | 5,010,000        | 50.8                  |
| <i>Escherichia coli</i> KCTC 2571            | 4,750,000        | 50.9                  |
| <b>Total : 10 strains</b>                    |                  |                       |

Supplementary Table S2 | The highest/lowest Z values and frequent sequences flanking substitution errors. <S> denotes substitution errors.

| Substitution error | NGS system | Highest Z value             | Most frequent sequence      | Lowest Z value              | Least frequent sequence          |
|--------------------|------------|-----------------------------|-----------------------------|-----------------------------|----------------------------------|
| Mono-nucleotides   | GS junior  | C<S>G                       | C<S>G                       | C<S>C                       | C<S>C                            |
|                    | FLX+       | C<S>G                       | C<S>G                       | C<S>C                       | G<S>G                            |
|                    | PGM        | T<S>A                       | C<S>T                       | C<S>C                       | G<S>G                            |
|                    | MiSeq      | C<S>G                       | G<S>G                       | T<S>G                       | A<S>T                            |
|                    | GAI        | C<S>G                       | G<S>T                       | A<S>T                       | C<S>C                            |
|                    | HiSeq      | G<S>G                       | G<S>G                       | T<S>G                       | T<S>G                            |
| Di-nucleotides     | GS junior  | TG<S>CG                     | TT<S>AT                     | AT<S>AT                     | CT<S>AG                          |
|                    | FLX+       | TG<S>CG                     | TT<S>CA                     | AT<S>AT                     | CT<S>AG                          |
|                    | PGM        | TC<S>CC                     | CC<S>TC                     | CC<S>CC                     | CT<S>AG                          |
|                    | MiSeq      | GG<S>GA                     | GG<S>GA                     | GG<S>CC                     | TA<S>TA                          |
|                    | GAI        | AG<S>TG                     | GG<S>TT                     | CC<S>CG                     | AC<S>CG                          |
|                    | HiSeq      | AC<S>GT                     | GG<S>GG                     | TA<S>AG                     | TA<S>CG                          |
| Tri-nucleotides    | GS junior  | CCG<S>ATC,<br>ACA<S>CCG     | TTT<S>ATC,<br>TTT<S>CAG     | ACA<S>CCC,<br>GGG<S>CCT     | TAT<S>ACG,<br>ACA<S>GTG, etc     |
|                    | FLX+       | CAC<S>AAT,<br>ATT<S>GTG     | CAC<S>AAT,<br>GGG<S>TGA     | ACA<S>CCC,<br>AAA<S>CCC     | CTC<S>TAG,<br>TCT<S>AGT, etc     |
|                    | PGM        | TGC<S>CCA,<br>ATT<S>GTG     | GCC<S>TCA,<br>ACC<S>TCA     | GCA<S>CGA,<br>AAA<S>TTT     | CTA<S>ATG,<br>TGT<S>TAG          |
|                    | MiSeq      | CGG<S>CAA,<br>GTG<S>TCC     | GGG<S>GAA,<br>GGG<S>TCA     | GGG<S>GAT,<br>GTG<S>TCT     | CTA<S>GAG,<br>TAC<S>TAG          |
|                    | GAI        | ATT<S>TAC,<br>GTA<S>AAT     | TTT<S>TTT,<br>TTT<S>TAA     | TTT<S>TAC,<br>GTA<S>AAA     | CGT<S>GGG,<br>GAC<S>CTA          |
|                    | HiSeq      | TGG<S>CCA,<br>CAC<S>GTG     | ATG<S>TCA,<br>TGA<S>CAT     | AGA<S>CAT,<br>TGG<S>CCT     | TTA<S>GCG,<br>CGT<S>ACG          |
| Tetra-nucleotides  | GS junior  | ACCG<S>CCTC,<br>CAAT<S>TATT | TCCG<S>CCTA,<br>GTGG<S>CCTG | GAAT<S>TATT,<br>AATA<S>ATTC | GCCG<S>CCTA,<br>TCGG<S>CCTG, etc |

|       |                             |                             |                             |                                  |
|-------|-----------------------------|-----------------------------|-----------------------------|----------------------------------|
| FLX+  | TCAC<S>AATA,<br>TATT<S>GTGA | TCAC<S>AATA,<br>TATT<S>GTGA | GTGG<S>GCAA,<br>TTGC<S>CCAC | ATAC<S>GTAT,<br>ACTG<S>TGTC, etc |
| PGM   | ACAG<S>TCCC,<br>TAGG<S>CGGA | TATT<S>AATA,<br>TCAC<S>AATA | TCCG<S>CCTG,<br>TATT<S>GTGC | TAGG<S>CGGT,<br>TAGA<S>CATG, etc |
| MiSeq | GGGG<S>GAAG,<br>CTTC<S>CCCC | GGGG<S>GAAG,<br>CGGG<S>TCAC | GTTC<S>CCCC,<br>CTTC<S>CCCA | AGGG<S>CCCT,<br>GTCT<S>CTAG, etc |
| GAI   | ACAG<S>TGTG,<br>GATC<S>CGTG | GATC<S>CGTG,<br>ACAG<S>TGTG | CACC<S>AAGG,<br>ATAA<S>GGCT | CCTT<S>GGTG,<br>GCCT<S>GGGT, etc |
| HiSeq | ACAC<S>GTGA,<br>TCAC<S>GTGT | GATG<S>TCAC,<br>GTGA<S>CATC | TCAC<S>GTGA,<br>CAGG<S>CCTG | GGCG<S>TCGT,<br>AGCG<S>TCGG      |

Supplementary Table S3 | Error rates and lengths of the longest homopolymers.

| NGS system | All reads | Length of a homopolymer |               |               |               |       |
|------------|-----------|-------------------------|---------------|---------------|---------------|-------|
|            |           | <4 bp                   | ≥4 bp & ≤5 bp | ≥6 bp & ≤7 bp | ≥8 bp & ≤9 bp | >9 bp |
| GS junior  | 0.50%     | 0.72%                   | 0.51%         | 0.75%         | 1.02%         | 1.67% |
| FLX+       | 0.72%     | 0.86%                   | 0.78%         | 0.90%         | 1.01%         | 1.26% |
| PGM        | 2.67%     | 2.64%                   | 2.68%         | 2.95%         | 3.71%         | 4.05% |
| MiSeq      | 0.95%     | 0.73%                   | 0.87%         | 0.96%         | 1.78%         | 2.08% |
| GAI        | 0.60%     | 0.58%                   | 0.57%         | 0.55%         | 1.55%         | 5.08% |
| HiSeq      | 0.67%     | 1.31%                   | 0.59%         | 0.49%         | 0.55%         | 0.97% |

“Length of a homopolymer” indicates the length of the longest homopolymer in each read.
